# Supplementary material for: Exo-coordinated discrete and continuous supramolecular silver(i) complexes with thiaoxa-macrocycles
Source: Royal Society of Chemistry journal article supplement (doi:10.1039/b710581a), 2007-10-09
Supplement: b710581a.pdf [file b710581a.pdf]

## Supplementary Data

### Exo-coordinated discrete and continuous supramolecular silver(I) complexes with thioxa-macrocycles

Hyun Jee Kim,<sup>a</sup> Il Yoon,<sup>a</sup> So Young Lee,<sup>a</sup> Kyu Seong Choi<sup>b</sup> and Shim Sung Lee<sup>\*a</sup>

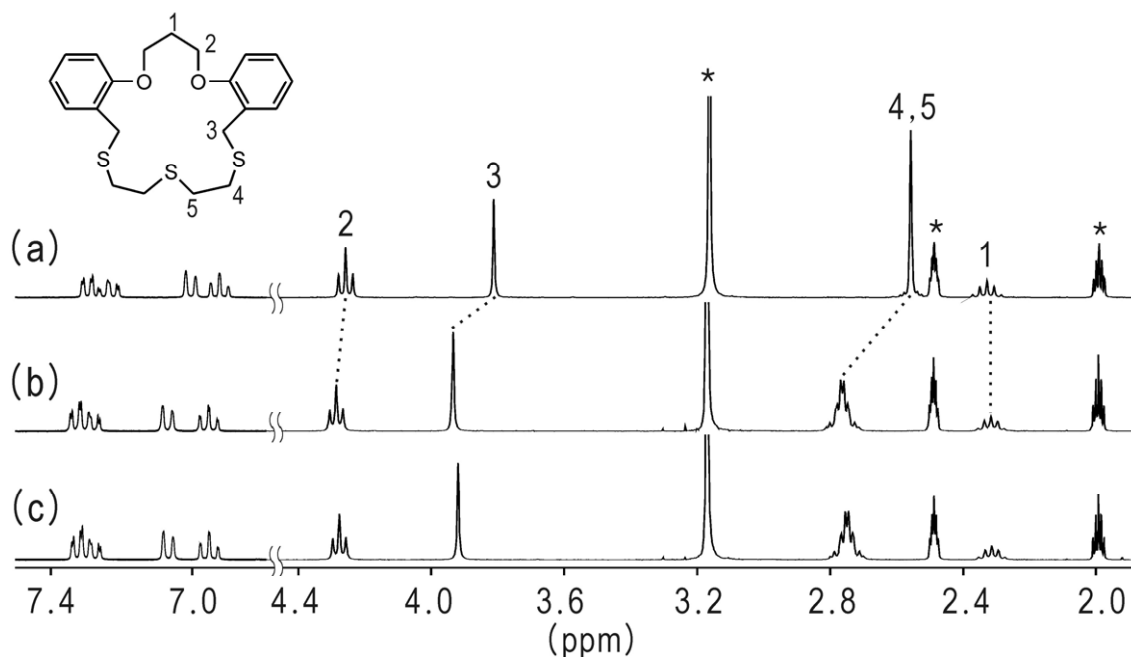

**Fig. S1.** <sup>1</sup>H-NMR spectra of (a) free **L**<sup>1</sup>, (b) **L**<sup>1</sup> + AgNO<sub>3</sub> (1.0 equiv.) and (c) **L**<sup>1</sup> + AgPF<sub>6</sub> (1.0 equiv.) in CD<sub>3</sub>CN:DMSO-*d*<sub>6</sub> (1:1). The peaks marked with an asterisk are from solvents and water.

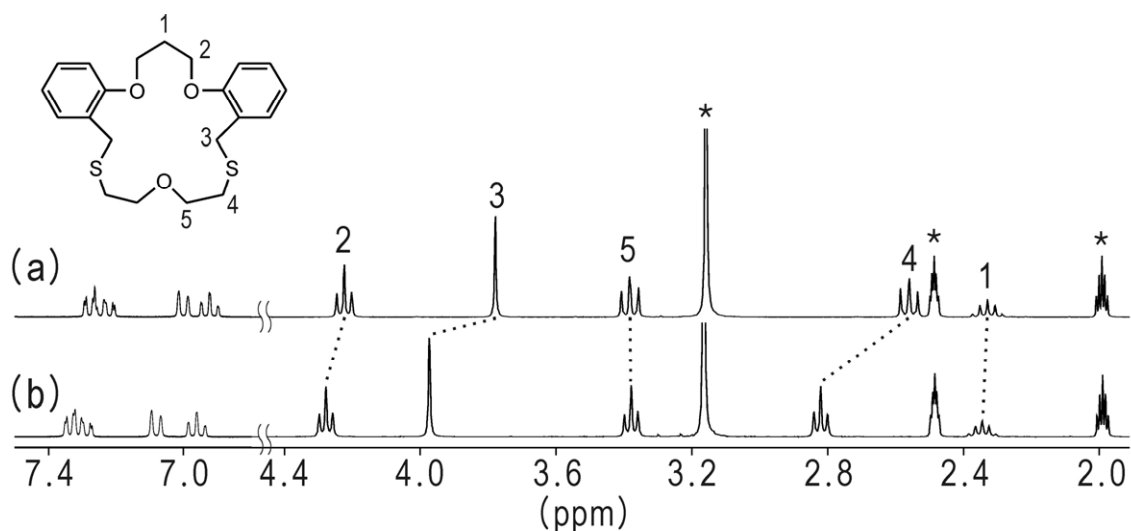

**Fig. S2.** <sup>1</sup>H-NMR spectra of (a) free **L**<sup>2</sup> and (b) **L**<sup>2</sup> + AgNO<sub>3</sub> (1.0 equiv.) in CD<sub>3</sub>CN:DMSO-*d*<sub>6</sub> (1:1). The

Supplementary Material (ESI) for New Journal of Chemistry  
This journal is (c) The Royal Society of Chemistry and  
The Centre National de la Recherche Scientifique, 2007

peaks marked with an asterisk are from solvents and water.
